# Supplementary material for: Massive horizontal gene transfer, strictly vertical inheritance and ancient duplications differentially shape the evolution of Bacillus cereus enterotoxin operons hbl, cytK and nhe
Source: PubMed Central journal article supplement (PMC4641410; doi:10.1186/s12862-015-0529-4), 2015-11-10
Supplement: 12862_2015_529_MOESM1_ESM.pdf [file 12862_2015_529_MOESM1_ESM.pdf]

**Table S1:** *De novo* whole genome sequencing results of 25 *B. cereus* sensu lato strains.

Sequencing statistics and results of read quality filtering/trimming and contig assembly are reported.

| Strain                                  | MiSeq® reagent Kit                | Quality filtering    | Raw read length [bp] | # Raw reads | # Filtered & trimmed reads | Trimmed read length [bp] | Genome coverage trimmed reads (x-fold) | K-mer size [bp] | N50     | # Contigs >500 bp | Assembly size [bp] | NCBI GenBank accession number |
|-----------------------------------------|-----------------------------------|----------------------|----------------------|-------------|----------------------------|--------------------------|----------------------------------------|-----------------|---------|-------------------|--------------------|-------------------------------|
| <i>B. cereus</i> F4430/73               | Version 1, 300 cycles, paired end | Length ≥ 70%, Q ≥ 20 | 145                  | 2,008,054   | 1,483,038                  | 113                      | <b>32</b>                              | 47              | 25,336  | <b>447</b>        | <b>5,577,793</b>   | JYPK00000000                  |
| <i>B. cereus</i> HWW 274-2              |                                   |                      |                      | 2,837,642   | 1,505,012                  |                          | <b>32</b>                              | 39              | 32,259  | <b>320</b>        | <b>5,290,159</b>   | JYPL00000000                  |
| <i>B. cereus</i> WSBC 10035             | Version 2, 500 cycles, paired end | Length ≥ 70%, Q ≥ 20 | 180                  | 2,996,320   | 1,247,284                  | 169                      | <b>38</b>                              | 75              | 52,377  | <b>184</b>        | <b>5,619,577</b>   | LABS00000000                  |
| <i>B. cereus</i> F4429/71               |                                   |                      |                      | 3,129,982   | 1,491,644                  |                          | <b>45</b>                              | 67              | 91,497  | <b>115</b>        | <b>5,284,967</b>   | JYPJ00000000                  |
| <i>B. cereus</i> 14294-3 (M6)           | Version 2, 500 cycles, paired end | Length ≥ 80%, Q ≥ 30 | 200                  | 5,225,132   | 4,625,090                  | 189                      | <b>165</b>                             | 99              | 875,707 | <b>25</b>         | <b>5,523,305</b>   | JYPF00000000                  |
| <i>B. cereus</i> INRA A3                | Version 3, 600 cycles, paired end | Length ≥ 80%, Q ≥ 30 | 250                  | 13,534,264  | 7,187,650                  | 239                      | <b>323</b>                             | 169             | 189,988 | <b>61</b>         | <b>6,075,647</b>   | LABH00000000                  |
| <i>B. cereus</i> INRA C3                |                                   |                      |                      | 9,841,330   | 4,702,936                  |                          | <b>213</b>                             | 173             | 348,619 | <b>38</b>         | <b>5,596,453</b>   | LABI00000000                  |
| <i>B. cereus</i> RIVM BC 934            |                                   |                      |                      | 13,029,356  | 6,521,168                  |                          | <b>295</b>                             | 203             | 62,879  | <b>207</b>        | <b>6,840,916</b>   | LABP00000000                  |
| <i>B. cereus</i> RIVM BC 964            | Version 3, 600 cycles, paired end | Length ≥ 80%, Q ≥ 30 | 250                  | 9,914,386   | 5,338,252                  | 192                      | <b>194</b>                             | 43              | 136,264 | <b>78</b>         | <b>5,815,402</b>   | LABQ00000000                  |
| <i>B. cereus</i> #17                    |                                   |                      |                      | 9,276,110   | 5,007,666                  | 192                      | <b>182</b>                             | 101             | 237,244 | <b>45</b>         | <b>5,852,222</b>   | JYFW00000000                  |
| <i>B. cereus</i> IP5832                 |                                   |                      |                      | 15,632,892  | 9,878,046                  | 196                      | <b>366</b>                             | 117             | 470,309 | <b>28</b>         | <b>5,592,318</b>   | LABJ00000000                  |
| <i>B. weihenstephanensis</i> WSBC 10204 |                                   |                      |                      | 10,434,454  | 6,063,602                  | 191                      | <b>219</b>                             | 85              | 296,898 | <b>43</b>         | <b>5,655,039</b>   | Complete genome available     |
| <i>B. cereus</i> RIVM BC 126            |                                   |                      |                      | 3,742,980   | 2,960,928                  | 230                      | <b>129</b>                             | 183             | 340,103 | <b>47</b>         | <b>5,417,487</b>   | LABO00000000                  |
| <i>B. cereus</i> NVH 0075-95            | Version 3 600 cycles, paired end  | Length ≥ 80%, Q ≥ 30 | 250                  | 4,453,098   | 3,407,364                  | 220                      | <b>142</b>                             | 177             | 172,877 | <b>92</b>         | <b>6,112,682</b>   | LABM00000000                  |
| <i>B. cereus</i> MHI 226                |                                   |                      |                      | 2,800,238   | 2,248,024                  | 230                      | <b>98</b>                              | 113             | 180,772 | <b>60</b>         | <b>6,233,017</b>   | LABL00000000                  |
| <i>B. cereus</i> RIVM BC 90             |                                   |                      |                      | 4,690,328   | 3,816,892                  | 230                      | <b>166</b>                             | 183             | 166,503 | <b>68</b>         | <b>5,559,670</b>   | LABN00000000                  |
| <i>B. cereus</i> 6/27/S                 |                                   |                      |                      | 3,507,602   | 2,686,982                  | 220                      | <b>112</b>                             | 115             | 67,058  | <b>176</b>        | <b>6,771,128</b>   | LABV00000000                  |
| <i>B. cereus</i> SDA KA 96              |                                   |                      |                      | 4,266,240   | 3,498,326                  | 220                      | <b>146</b>                             | 167             | 402,005 | <b>34</b>         | <b>5,335,844</b>   | LABR00000000                  |
| <i>B. cereus</i> 7/27/S                 |                                   |                      |                      | 3,604,194   | 2,965,452                  | 225                      | <b>126</b>                             | 153             | 259,768 | <b>48</b>         | <b>5,479,572</b>   | LABW00000000                  |
| <i>B. cereus</i> MHI 86                 |                                   |                      |                      | 3,970,862   | 3,038,394                  | 220                      | <b>126</b>                             | 63              | 192,413 | <b>54</b>         | <b>5,551,873</b>   | LABK00000000                  |
| <i>B. cereus</i> F3175/03               |                                   |                      |                      | 2,913,134   | 2,235,522                  | 220                      | <b>93</b>                              | 73              | 204,296 | <b>64</b>         | <b>5,733,808</b>   | JYPI00000000                  |
| <i>B. cereus</i> F3162/04               |                                   |                      |                      | 3,033,036   | 2,338,464                  | 220                      | <b>97</b>                              | 43              | 170,740 | <b>77</b>         | <b>5,591,156</b>   | JZEV00000000                  |
| <i>B. cytotoxicus</i> CVUAS 2833        |                                   |                      |                      | 3,185,212   | 2,298,738                  | 210                      | <b>91</b>                              | 177             | 318,402 | <b>36</b>         | <b>4,127,075</b>   | JYPG00000000                  |
| <i>B. cereus</i> F528/94                | Version 3, 600 cycles, paired end | Length ≥ 80%, Q ≥ 30 | 230                  | 7,027,494   | 5,982,372                  | 219                      | <b>248</b>                             | 167             | 355,056 | <b>49</b>         | <b>5,935,300</b>   | JYPH00000000                  |
| <i>B. mycoides</i> WSBC 10969           |                                   |                      |                      | 6,040,358   | 4,819,360                  | 210                      | <b>192</b>                             | 167             | 270,494 | <b>54</b>         | <b>6,101,972</b>   | LABT00000000                  |

Reference genome: *B. cereus* F837/76 (5,288,498 bp)

**Table S2:** List of 218 *B. cereus* sensu lato strains investigated in this study.

142 strains listed in the first part of the table were included in the final set and are listed according to their cluster affiliation (C1 – C7) derived from concatenated housekeeping gene species tree (Fig. 1). Presence (x) or absence (-) of toxin and regulator genes is indicated. For 76 strains listed in the second part of the table, one or more housekeeping gene(s) or *plcR* could not be identified from the genome sequence. These strains were excluded from further analyses. Type strains are highlighted in bold, strains sequenced in this study are marked by an asterisk.

Ba: *Bacillus anthracis*, Bb: *Bacillus bombysepticus*, Bcyt: *Bacillus cytotoxicus*, Bm: *Bacillus mycoides*, Bpm: *Bacillus pseudomycoides*, Bt: *Bacillus thuringiensis*, Btoy: *Bacillus toyonensis*, Bw : *Bacillus weihenstephanensis*, not specified name: *Bacillus cereus*.

**Part 1: Final strainset**

| Cluster               | Strain | Original name                | <i>nhe</i> | <i>hbl</i> | <i>cytK</i> | <i>plcR</i> | <i>2. hbl</i> | <i>2. nhe</i> | <i>ces</i> | Source                             | Reference                              |
|-----------------------|--------|------------------------------|------------|------------|-------------|-------------|---------------|---------------|------------|------------------------------------|----------------------------------------|
| <b>Cluster 1 (C1)</b> |        |                              |            |            |             |             |               |               |            |                                    |                                        |
| C1_S1                 | 282    | <b>Bpm DSM 12442</b>         | x          | -          | -           | x           | -             | -             | -          | Soil                               | [1]                                    |
| C1_S2                 | 152    | Bm Rock3-17                  | x          | -          | -           | x           | x             | -             | -          | Soil, Maryland                     | [2]                                    |
| <b>Cluster 2 (C2)</b> |        |                              |            |            |             |             |               |               |            |                                    |                                        |
| C2_S1                 | 47     | BAG2X1-2                     | x          | x          | -           | x           | x             | -             | -          | Soil, Massachusetts                | [3]                                    |
| C2_S2                 | 56     | BAG6X1-1                     | x          | x          | -           | x           | x             | -             | -          | Soil, Massachusetts                | [3]                                    |
| C2_S3                 | 106    | MM3                          | x          | x          | -           | x           | -             | -             | -          | Food                               | [2]                                    |
| C2_S4                 | 140    | MHI 226 *                    | x          | -          | -           | x           | x             | x             | -          | Milk and milk products, Germany    | 1)                                     |
| C2_S5                 | 144    | 14294-3 (M6) *               | x          | x          | x           | x           | x             | x             | -          | Ice cream, Germany, 2004           | 3) WSBC 10904                          |
| C2_S6                 | 156    | BAG5X2-1                     | x          | x          | x           | x           | x             | -             | -          | Soil, Massachusetts                | [3]                                    |
| C2_S7                 | 211    | BAG2O-3                      | x          | -          | -           | x           | x             | -             | -          | Soil, Massachusetts                | [3]                                    |
| C2_S8                 | 243    | RIVM BC 126 *                | x          | x          | -           | x           | x             | -             | -          | Patients faeces, Netherlands, 1999 | 2)                                     |
| <b>Cluster 3 (C3)</b> |        |                              |            |            |             |             |               |               |            |                                    |                                        |
| C3_S1                 | 28     | <b>Ba str. Ames Ancestor</b> | x          | -          | -           | x           | -             | -             | -          | Dead heifer, Texas                 | [4]                                    |
| C3_S2                 | 29     | Ba str. Ames                 | x          | -          | -           | x           | -             | -             | -          | Laboratory strain                  | [5]                                    |
| C3_S3                 | 21     | Ba str. A0248                | x          | -          | -           | x           | -             | -             | -          | Human, USAMRIID, Ohio              | sequenced by J. Craig Venter Institute |
| C3_S4                 | 35     | Ba str. H9401                | x          | -          | -           | x           | -             | -             | -          | Clinical, cutaneous anthrax, Korea | [6]                                    |
| C3_S5                 | 38     | Ba str. Sterne               | x          | -          | -           | x           | -             | -             | -          | Laboratory strain                  | [4]                                    |
| C3_S6                 | 1      | 03BB102                      | x          | -          | -           | x           | -             | -             | -          | Dust, fatal pneumonia, Texas       | Sequenced by TIGR                      |
| C3_S7                 | 2      | 95/8201                      | x          | -          | x           | x           | -             | -             | -          | Endocarditis, UK 1995              | [2]                                    |

|        |     |                                     |   |   |   |   |   |   |   |                                                    |                                               |
|--------|-----|-------------------------------------|---|---|---|---|---|---|---|----------------------------------------------------|-----------------------------------------------|
| C3_S8  | 3   | NVH 0075-95 *                       | x | - | - | x | - | - | - | Stew with vegetables, food poisoning, Norway, 1995 | [7]                                           |
| C3_S9  | 5   | HWW 274-2 *                         | x | - | x | x | - | - | - | Milk powder, Germany, 2004                         | Lang-Halter, unpublished                      |
| C3_S10 | 8   | AH187                               | x | - | - | x | - | - | x | Vomit, cooked rice, London 1972                    | [8]                                           |
| C3_S11 | 12  | AH820                               | x | x | x | x | - | - | - | Periodontosis, Norway 1995                         | [9]                                           |
| C3_S12 | 17  | ATCC 10987                          | x | - | x | x | - | - | - | Cheese spoilage, Canada 1930                       | [10]                                          |
| C3_S13 | 60  | BDRD-ST26                           | x | - | - | x | - | - | - | BDRD stock strain                                  | [2]                                           |
| C3_S14 | 62  | biovar anthracis str. CI            | x | - | - | x | - | - | - | Chimpanzee, fatal anthrax, Cote d'Ivoire (CI) 2001 | [11]                                          |
| C3_S15 | 70  | Bt serovar andalousiensis BGSC 4AW1 | x | - | x | x | - | - | - | Spain                                              | [2]                                           |
| C3_S16 | 73  | Bt serovar finitimus YBT-020        | x | x | - | x | - | - | - | Soil, China (Huazhong Agricultural University)     | [12]                                          |
| C3_S17 | 75  | Bt serovar konkukian str. 97-27     | x | x | x | x | - | - | - | Wound infection, french soldier in Yugoslavia      | [13]                                          |
| C3_S18 | 77  | Bt serovar monterrey BGSC 4AJ1      | x | x | x | x | - | - | - | Mexico                                             | [14]                                          |
| C3_S19 | 80  | Bt serovar pulsiensis BGSC 4CC1     | x | - | x | x | - | - | - | Grain field, Pakistan                              | [2]                                           |
| C3_S20 | 83  | Bt serovar tochiensis BGSC 4Y1      | x | x | x | x | - | - | - | Soil, Japan                                        | [2]                                           |
| C3_S21 | 84  | Bt str. Al Hakam                    | x | x | - | x | - | - | - | Suspected bioweapon facility, Iraq                 | [15]                                          |
| C3_S22 | 90  | E33L                                | x | - | x | x | - | - | - | Zebra carcass, Namibia, 1996                       | [4]                                           |
| C3_S23 | 91  | F837/76                             | x | x | - | x | - | - | - | Human, wound, postoperative infection              | [16]                                          |
| C3_S24 | 93  | FRI-35                              | x | - | x | x | - | - | - | ?                                                  | Sequenced by Los Alamos National              |
| C3_S25 | 102 | ISP3191                             | x | - | - | x | - | - | - | Spice, Belgium                                     | [17]                                          |
| C3_S26 | 104 | m1293                               | x | - | - | x | - | - | - | Cream cheese                                       | [2]                                           |
| C3_S27 | 109 | MSX-D12                             | x | - | x | x | - | - | - | Antarctic concordia station and ISS                | [3]                                           |
| C3_S28 | 110 | NC7401                              | x | - | - | x | - | - | x | Food poisoning, chow mein, Japan                   | [18]                                          |
| C3_S29 | 113 | Q1                                  | x | - | - | x | - | - | - | Deep surface oil reservoir, China                  | [19]                                          |
| C3_S30 | 119 | Rock3-42                            | x | - | x | x | - | - | - | Soil, Rockville in Maryland                        | [2]                                           |
| C3_S31 | 139 | MHI 86 *                            | x | - | x | x | - | - | - | Infant food, Germany                               | 1)                                            |
| C3_S32 | 141 | SDA KA 96 *                         | x | x | x | x | - | - | - | Raw milk, Sweden, 1997                             | [20]                                          |
| C3_S33 | 142 | WSBC 10035 *                        | x | - | - | x | - | - | - | Pasteurized milk, Germany, 1993                    | [20]                                          |
| C3_S34 | 143 | F4429/71 *                          | x | - | x | x | - | - | - | Vanilla pudding, Netherlands, 1971                 | 1) MHI 1543                                   |
| C3_S35 | 148 | ATCC 4342                           | x | x | - | x | - | - | - | ?                                                  | [2]                                           |
| C3_S36 | 161 | BGSC 6E1                            | x | x | - | x | - | - | - | ?                                                  | [2]                                           |
| C3_S37 | 205 | IS195                               | x | - | - | x | - | - | x | Intestine of bank vole, Poland                     | [21]                                          |
| C3_S38 | 206 | IS845/00                            | x | - | - | x | - | - | - | Intestine of bank vole, Poland                     | [21]                                          |
| C3_S39 | 212 | F                                   | x | - | - | x | - | - | - | Permafrost sample, 3 mio. years old                | Institute of chemical biology and fundamental |
| C3_S40 | 242 | F528/94 *                           | x | x | - | x | - | - | - | Beef chow mein & rice, food poisoning, UK          | [22]                                          |
| C3_S41 | 244 | RIVM BC 90 *                        | x | - | - | x | - | - | - | Human faeces, Netherlands, 1999                    | 2)                                            |
| C3_S42 | 246 | 7/27/S *                            | x | - | - | x | - | - | - | Human faeces                                       | 1) MHI 3185                                   |

|                       |     |                                          |   |   |   |   |   |   |   |                                                   |                                     |
|-----------------------|-----|------------------------------------------|---|---|---|---|---|---|---|---------------------------------------------------|-------------------------------------|
| C3_S43                | 248 | F3162/04 *                               | x | - | x | x | - | - | - | Human faeces, 2004                                | 1) MHI 3173                         |
| <b>Cluster 4 (C4)</b> |     |                                          |   |   |   |   |   |   |   |                                                   |                                     |
| C4_S1                 | 15  | ATCC 14579                               | x | x | x | x | - | - | - | Air, cow-shed                                     | [23]                                |
| C4_S2                 | 71  | <b>Bt serovar berliner</b><br>ATCC 10792 | x | x | x | x | - | - | - | Mediterranean flour moth<br>(Ephestia kuehniella) | [2]                                 |
| C4_S3                 | 4   | F4430/73 *                               | x | x | x | x | - | - | - | Pea soup, Belgium, 1973                           | [24]                                |
| C4_S4                 | 6   | 172560W                                  | x | x | x | x | x | - | - | Burn wound                                        | [2]                                 |
| C4_S5                 | 11  | AH676                                    | x | x | x | x | - | - | - | Soil, Norway                                      | [2]                                 |
| C4_S6                 | 16  | ATCC 10876                               | x | x | x | x | x | - | - | ?                                                 | [2]                                 |
| C4_S7                 | 18  | B4264                                    | x | x | x | x | - | - | - | Fatal pneumonia, blood<br>and pleural fluid, 1969 | [2]                                 |
| C4_S8                 | 48  | BAG30-2                                  | x | x | x | x | - | - | - | Soil, Massachusetts                               | [3]                                 |
| C4_S9                 | 50  | BAG3X2-2                                 | x | x | x | x | x | - | - | Soil, Massachusetts                               | [3]                                 |
| C4_S10                | 51  | BAG40-1                                  | x | x | x | x | - | - | - | Soil, Massachusetts                               | [3]                                 |
| C4_S11                | 53  | BAG4X12-1                                | x | x | x | x | - | - | - | Soil, Massachusetts                               | [3]                                 |
| C4_S12                | 58  | BDRD-Cer4                                | x | x | x | x | - | - | - | BDRD stock strain                                 | [2]                                 |
| C4_S13                | 59  | BDRD-ST24                                | x | x | x | x | - | - | - | BDRD stock strain                                 | [2]                                 |
| C4_S14                | 63  | Bt BMB171                                | x | x | x | x | - | - | - | Lab strain, China                                 | [25]                                |
| C4_S15                | 64  | Bt Bt407                                 | x | x | x | x | - | - | - | ? Strain isolated by O.<br>Arantes                | [26]                                |
| C4_S16                | 65  | Bt HD-771                                | x | x | - | x | x | - | - | ?                                                 | Sequenced by Los<br>Alamos National |
| C4_S17                | 66  | Bt HD-789                                | x | x | x | x | - | - | - | ?                                                 | Sequenced by Los<br>Alamos National |
| C4_S18                | 67  | Bt IBL 200                               | x | x | x | x | - | - | - | Human                                             | [2]                                 |
| C4_S19                | 68  | Bt IBL 4222                              | x | x | x | x | - | - | - | Cat                                               | [2]                                 |
| C4_S20                | 72  | Bt serovar chinensis CT-<br>43           | x | x | x | x | - | - | - | China                                             | [27]                                |
| C4_S21                | 74  | Bt serovar huazhongensis<br>BGSC 4BD1    | x | x | - | x | x | - | - | China                                             | [2]                                 |
| C4_S22                | 76  | Bt serovar kurstaki str.<br>T03a001      | x | x | x | x | x | - | - | Mediterranean flour moth<br>(Ephestia kuehniella) | [2]                                 |
| C4_S23                | 78  | Bt serovar pakistani str.<br>T13001      | x | x | x | x | - | - | - | Lepidoptera                                       | [2]                                 |
| C4_S24                | 82  | Bt serovar thuringiensis<br>str. T01001  | x | x | x | x | - | - | - | Mediterranean flour moth<br>(Ephestia kuehniella) | [2]                                 |
| C4_S25                | 92  | F65185                                   | x | x | x | x | - | - | - | Open fracture, New York                           | [2]                                 |
| C4_S26                | 95  | G9842                                    | x | x | - | x | - | - | - | Stool, food poisoning,<br>Nebraska 1996           | [28]                                |
| C4_S27                | 105 | m1550                                    | x | x | x | x | - | - | - | Uncooked chicken, Brazil                          | [2]                                 |
| C4_S28                | 116 | Rock1-15                                 | x | x | x | x | - | - | - | Soil, Rockville in<br>Maryland                    | [2]                                 |
| C4_S29                | 123 | VD014                                    | x | x | x | x | - | - | - | Soil, Spain                                       | [17]                                |
| C4_S30                | 131 | VD156                                    | x | x | x | x | - | - | - | Soil, Abu Dhabi, UAE                              | [17]                                |
| C4_S31                | 133 | VD169                                    | x | x | x | x | - | - | - | Dubai, UAE                                        | [17]                                |
| C4_S32                | 134 | VD200                                    | x | x | x | x | - | - | - | Water, Scotland                                   | [17]                                |
| C4_S33                | 175 | VD133                                    | x | x | x | x | x | - | - | Soil, Martinique                                  | [17]                                |

|        |     |                                      |   |   |   |   |   |   |   |                                            |                                  |
|--------|-----|--------------------------------------|---|---|---|---|---|---|---|--------------------------------------------|----------------------------------|
| C4_S34 | 199 | BAG2O-1                              | x | - | x | x | - | - | - | Soil, Massachusetts                        | [3]                              |
| C4_S35 | 201 | BAG1X2-2                             | x | - | x | x | - | - | - | Soil, Massachusetts                        | [3]                              |
| C4_S36 | 202 | BAG1X2-1                             | x | - | x | x | - | - | - | Soil, Massachusetts                        | [3]                              |
| C4_S37 | 213 | Bt DAR 81934                         | x | x | x | x | - | - | - | Australia                                  | [29]                             |
| C4_S38 | 214 | Bt serovar thuringiensis str. IS5056 | x | x | x | x | - | - | - | Soil, Biebrza Nation Park, Poland          | [30]                             |
| C4_S39 | 235 | Bt YBT-1518                          | x | x | x | x | - | - | - | Soil, China                                | Huazhong Agricultural University |
| C4_S40 | 236 | #17 *                                | x | x | x | x | - | - | - | Mouse microbiota                           | Obtained from Thomas Clavel      |
| C4_S41 | 238 | RIVM BC 964 *                        | x | - | x | x | - | - | - | Kebab, Netherlands, 2002                   | 2)                               |
| C4_S42 | 239 | RIVM BC 934 *                        | x | x | x | x | - | - | - | Lettuce, Netherlands, 2002                 | [20]                             |
| C4_S43 | 240 | INRA A3 *                            | x | x | x | x | - | x | - | Starch, Normandie, France, 1998            | [20]                             |
| C4_S44 | 241 | INRA C3 *                            | x | x | x | x | - | - | - | Pasteurized carrot, Vaucluse, France, 1996 | [20]                             |
| C4_S45 | 245 | 6/27/S *                             | x | x | x | x | x | - | - | Human faeces                               | 1) MHI 3172                      |
| C4_S46 | 247 | F3175/03 *                           | x | x | x | x | - | - | - | Human faeces, 2004                         | 1) MHI 3169                      |
| C4_S47 | 251 | HD73                                 | x | x | x | x | x | - | - | ?                                          | Sequenced by Broad Institute     |
| C4_S48 | 280 | Bw FSL R5-860                        | x | x | x | x | - | - | - | Pasteurized Milk                           | Sequenced by Cornell University  |
| C4_S49 | 288 | Bb str. Wang                         | x | x | x | x | - | - | - | Cadaver of silkworm larvae (Bombyx mori)   | [31]                             |

#### Cluster 5 (C5)

|        |     |                      |   |   |   |   |   |   |   |                                           |      |
|--------|-----|----------------------|---|---|---|---|---|---|---|-------------------------------------------|------|
| C5_S1  | 289 | <b>Btoy BCT-7112</b> | x | x | - | x | - | - | - | Purified for use as probiotic, Japan 1966 | [32] |
| C5_S2  | 44  | BAG1O-2              | x | x | - | x | x | - | - | Soil, Massachusetts                       | [3]  |
| C5_S3  | 52  | BAG4X2-1             | x | x | - | x | x | - | - | Soil, Massachusetts                       | [3]  |
| C5_S4  | 54  | BAG5O-1              | x | x | - | x | x | - | - | Soil, Massachusetts                       | [3]  |
| C5_S5  | 55  | BAG6O-1              | x | x | - | x | x | - | - | Soil, Massachusetts                       | [3]  |
| C5_S6  | 69  | Bt MC28              | x | x | - | x | x | - | - | Forest, Sichuan China                     | [33] |
| C5_S7  | 99  | HuB2-9               | x | x | - | x | x | - | - | Environmental isolate                     | [17] |
| C5_S8  | 100 | HuB5-5               | x | x | - | x | - | - | - | Environmental isolate                     | [17] |
| C5_S9  | 115 | Rock1-3              | x | x | - | x | x | - | - | Soil, Rockville in Maryland               | [2]  |
| C5_S10 | 117 | Rock3-28             | x | x | - | x | x | - | - | Soil, Rockville in Maryland               | [2]  |
| C5_S11 | 118 | Rock3-29             | x | x | - | x | x | - | - | Soil, Rockville in Maryland               | [2]  |
| C5_S12 | 121 | Rock4-18             | x | x | x | x | - | - | - | Soil, Rockville in Maryland               | [2]  |
| C5_S13 | 129 | VD148                | x | x | - | x | x | - | - | Soil, Switzerland                         | [17] |
| C5_S14 | 173 | HuB4-10              | x | x | - | x | x | - | - | Environmental isolate                     | [17] |
| C5_S15 | 180 | VD115                | x | x | x | x | x | - | - | Soil, France                              | [17] |
| C5_S16 | 209 | VD214                | x | x | - | x | x | - | - | Water, Scotland                           | [17] |
| C5_S17 | 210 | BAG2O-2              | x | x | - | x | x | - | - | Soil, Massachusetts                       | [3]  |
| C5_S18 | 220 | HuA2-3               | x | x | - | x | x | - | - | Environmental isolate                     | [17] |

|                       |     |                        |   |   |   |   |   |   |   |                                               |                                 |
|-----------------------|-----|------------------------|---|---|---|---|---|---|---|-----------------------------------------------|---------------------------------|
| C5_S19                | 229 | VD131                  | x | x | - | x | x | - | - | Soil, Martinique                              | [17]                            |
| C5_S20                | 237 | IP5832 *               | x | x | - | x | - | - | - | Commercial probiotic                          | [34]                            |
| <b>Cluster 6 (C6)</b> |     |                        |   |   |   |   |   |   |   |                                               |                                 |
| C6_S1                 | 87  | <b>Bw WSBC 10204 *</b> | x | x | - | x | x | x | - | Milk                                          | [35]                            |
| C6_S2                 | 150 | <b>Bm DSM 2048</b>     | x | x | - | x | - | - | - | Soil                                          | [2]                             |
| C6_S3                 | 10  | AH621                  | x | x | - | x | x | - | - | Soil, Norway                                  | [2]                             |
| C6_S4                 | 61  | BDRD-ST196             | x | x | - | x | x | - | - | BDRD stock strain                             | [2]                             |
| C6_S5                 | 85  | Bw KBAB4               | x | - | - | x | x | x | - | Soil                                          | [4]                             |
| C6_S6                 | 97  | HuA2-4                 | x | - | - | x | x | - | - | Environmental isolate                         | [17]                            |
| C6_S7                 | 126 | VD048                  | x | x | - | x | x | - | - | Soil, Denmark                                 | [17]                            |
| C6_S8                 | 135 | VDM022                 | x | x | - | x | x | - | - | Soil, Greenland                               | [17]                            |
| C6_S9                 | 137 | VDM062                 | x | - | - | x | x | - | - | Soil, Scotland                                | [17]                            |
| C6_S10                | 149 | Bw BtB2-4              | x | x | - | x | x | - | - | Forest soil, Belgium                          | [36]                            |
| C6_S11                | 155 | BAG5X1-1               | x | x | - | x | - | - | - | Soil, Massachusetts                           | [3]                             |
| C6_S12                | 166 | Bw CER057              | x | x | - | x | x | - | x | Parsley, Belgium                              | [36]                            |
| C6_S13                | 168 | Bw CER074              | x | x | - | x | x | - | x | Raw milk, Belgium                             | [36]                            |
| C6_S14                | 174 | Bw MC67                | x | x | - | x | - | - | x | Soil, Denmark                                 | [37]                            |
| C6_S15                | 177 | VD078                  | x | x | - | x | x | - | - | Soil, Greenland                               | [17]                            |
| C6_S16                | 232 | VDM019                 | x | x | - | x | x | - | - | Soil, Greenland                               | [17]                            |
| C6_S17                | 279 | Bw FSL H7-687          | x | x | - | x | - | - | - | Pasteurized Milk                              | Sequenced by Cornell University |
| C6_S18                | 283 | Bm WSBC 10969 *        | x | x | - | x | x | - | - | Raw milk, Germany, 2014                       | This study                      |
| <b>Cluster 7 (C7)</b> |     |                        |   |   |   |   |   |   |   |                                               |                                 |
| C7_S1                 | 57  | <b>Bcvt NVH 391-98</b> | x | - | x | x | - | - | - | Vegetable puree, food poisoning, France, 1998 | [38]                            |
| C7_S2                 | 249 | Bcvt CVUAS2833 *       | x | - | x | x | - | - | - | Potato puree, food poisoning, Germany, 2007   | [39]                            |

- 1) Strain collection of the Department for Hygiene and Technology of Milk (MHI), Germany  
2) Strain collection of the Rijksinstituut voor Volksgezondheid en Milieu (RIVM), Netherlands  
3) Weihenstephan *Bacillus cereus* group Strain Collection (WSBC), Germany

### Part 2: Additional strains

| Cluster | Strain | Original name | <i>nhe</i> | <i>hbl</i> | <i>cytK</i> | <i>plcR</i> | <i>2. hbl</i> | <i>2. nhe</i> | <i>ces</i> | Source                                         | Reference                        |
|---------|--------|---------------|------------|------------|-------------|-------------|---------------|---------------|------------|------------------------------------------------|----------------------------------|
|         | 9      | AH603         | x          | x          | -           | -           | -             | -             | -          | Dairy                                          | [2]                              |
|         | 13     | AH1134        | x          | x          | x           | -           | -             | -             | -          | Pediatric endophthalmitis, Oklahoma City, Dean | Sequenced by TIGR                |
|         | 14     | AND1407       | x          | -          | -           | -           | -             | -             | x          | Blackcurrant                                   | [36]                             |
|         | 19     | Ba str. A0174 | x          | -          | -           | -           | -             | -             | -          | Canada                                         | Sequenced by Los Alamos National |
|         | 20     | Ba str. A0193 | x          | -          | -           | -           | -             | -             | -          | Bovine isolate, South Dakota                   | Sequenced by Los Alamos National |
|         | 22     | Ba str. A0389 | x          | -          | -           | -           | -             | -             | -          | Bekasi, Indonesia                              | Sequenced by Los Alamos National |
|         | 23     | Ba str. A0442 | x          | -          | -           | -           | -             | -             | -          | Kudu (Antelope), Kruger National Park, South   | Sequenced by Los Alamos National |

|     |                                       |   |   |   |   |   |   |   |                                            |                                        |
|-----|---------------------------------------|---|---|---|---|---|---|---|--------------------------------------------|----------------------------------------|
| 24  | Ba str. A0465                         | x | - | - | - | - | - | - | Bovine isolate, France                     | Sequenced by Los Alamos National       |
| 25  | Ba str. A0488                         | x | - | - | - | - | - | - | Infected cattle, UK 1935                   | Sequenced by Los Alamos National       |
| 26  | Ba str. A1055                         | x | - | - | - | - | - | - | From Paul Keim's laboratory                | [4]                                    |
| 27  | Ba str. A2012                         | x | - | - | - | - | - | - | Clinical, inhalational anthrax, West Palm  | [5]                                    |
| 30  | Ba str. Australia 94                  | x | - | - | - | - | - | - | Australia                                  | [4]                                    |
| 31  | Ba str. BF1                           | x | - | - | - | - | - | - | Cow carcass, Bavaria, Germany              | [40]                                   |
| 32  | Ba str. CDC 684                       | x | - | - | x | - | - | - | ?                                          | Sequenced by J. Craig Venter Institute |
| 33  | Ba str. CNEVA-9066                    | x | - | - | - | - | - | - | France                                     | [4]                                    |
| 34  | Ba str. Carbosap                      | x | - | - | - | - | - | - | Italy                                      | [41]                                   |
| 36  | Ba str. Heroin Ba4599                 | x | - | - | - | - | - | - | Clinical, first case of anthrax outbreak,  | [42]                                   |
| 37  | Ba str. Kruger B                      | x | - | - | - | - | - | - | Kruger National Park, Sout Africa          | [5]                                    |
| 39  | Ba str. Tsiankovskii-I                | x | - | - | - | - | - | - | Soviet Union                               | Sequenced by J. Craig Venter Institute |
| 40  | Ba str. UR-1                          | x | - | - | - | - | - | - | Clinical, injectional anthrax in a German  | [43]                                   |
| 41  | Ba str. Vollum                        | x | - | - | - | - | - | - | Occurs in the UK, Spain, Zimbabwe          | [4]                                    |
| 42  | Ba str. Western North America USA6153 | x | - | - | - | - | - | - | ?                                          | [4]                                    |
| 45  | BAG1X1-2                              | x | x | x | - | - | - | - | Soil, Massachusetts                        | [3]                                    |
| 46  | BAG1X1-3                              | x | x | - | x | - | - | - | Soil, Massachusetts                        | [3]                                    |
| 49  | BAG3X2-1                              | x | x | - | x | - | - | - | Soil, Massachusetts                        | [3]                                    |
| 79  | Bt serovar pondicheriensis BGSC       | x | x | x | x | - | - | - | Soil, India                                | [2]                                    |
| 81  | Bt serovar sotto str. T04001          | x | x | - | x | x | - | - | Canada                                     | [2]                                    |
| 94  | G9241                                 | x | x | x | - | - | - | - | Pneumonia, 1987                            | [44]                                   |
| 96  | Bt s. kurstaki str. HD73              | x | x | x | x | x | - | - | ?                                          | [45]                                   |
| 98  | HuB1-1                                | x | x | x | x | - | - | - | Environmental isolate                      | [17]                                   |
| 101 | IS075                                 | x | - | - | - | - | - | x | Intestine of bank vole, Poland             | [21]                                   |
| 103 | LCT-BC244                             | x | - | - | - | - | - | - | China General Microbiological Culture      | [46]                                   |
| 107 | MSX-A1                                | x | x | x | - | - | - | - | Antarctic concordia station and ISS        | [3]                                    |
| 108 | MSX-A12                               | x | - | - | - | - | - | - | Antarctic concordia station and ISS        | [3]                                    |
| 111 | NVH0597-99                            | x | - | x | - | - | - | - | Spice mix, food poisoning outbreak, Norway | Sequenced by TIGR                      |
| 114 | R3098/03                              | x | - | - | x | - | - | - | Septicemia, UK                             | [2]                                    |
| 120 | Rock4-2                               | x | x | x | x | - | - | - | Soil, Rockville in Maryland                | [2]                                    |
| 122 | SJ1                                   | x | - | x | - | - | - | - | ?                                          | University of Arizona                  |
| 124 | VD022                                 | x | x | - | - | - | - | - | Water, Belgium                             | [17]                                   |
| 125 | VD045                                 | x | x | x | - | - | - | - | Soil, Denmark                              | [17]                                   |
| 127 | VD102                                 | x | - | x | - | - | - | - | Soil, Guadeloupe                           | [17]                                   |
| 128 | VD142                                 | x | x | - | - | - | - | - | Soil, Scotland                             | [17]                                   |

|     |            |   |   |   |   |   |   |   |                                                  |                                        |
|-----|------------|---|---|---|---|---|---|---|--------------------------------------------------|----------------------------------------|
| 130 | VD154      | x | x | x | - | - | - | - | Soil, Abu Dhabi, UAE                             | [17]                                   |
| 132 | VD166      | x | x | x | - | - | - | - | Dubai, UAE                                       | [17]                                   |
| 136 | VDM034     | x | x | - | x | - | - | - | Soil, Spain                                      | [17]                                   |
| 138 | W          | x | x | x | - | - | - | - | ?                                                | Sequenced by TIGR                      |
| 146 | AH1272     | x | x | - | x | - | - | - | Amniotic fluid, Iceland                          | [2]                                    |
| 147 | AH1273     | x | x | - | x | - | - | - | Human blood, Iceland                             | [2]                                    |
| 151 | Bm Rock1-4 | x | x | - | x | - | - | - | Soil, Maryland                                   | [2]                                    |
| 153 | BAG2X1-1   | x | x | - | x | - | - | - | Soil, Massachusetts                              | [3]                                    |
| 158 | BAG6O-2    | x | x | - | x | - | - | - | Soil, Massachusetts                              | [3]                                    |
| 160 | BAG6X1-2   | x | x | - | - | - | - | - | Soil, Massachusetts                              | [3]                                    |
| 171 | HuA2-1     | x | x | - | - | - | - | - | Environmental isolate                            | [17]                                   |
| 172 | HuA4-10    | x | x | - | x | - | - | - | Environmental isolate                            | [17]                                   |
| 179 | VD107      | x | x | - | - | - | - | - | Soil, Guadeloupe                                 | [17]                                   |
| 188 | VD118      | x | x | - | x | - | - | - | Soil, Guadeloupe                                 | [17]                                   |
| 196 | BAG2X1-3   | x | x | - | x | - | - | - | Soil, Massachusetts                              | [3]                                    |
| 200 | BAG1X2-3   | x | - | x | x | - | - | - | Soil, Massachusetts                              | [3]                                    |
| 203 | BAG1X1-1   | x | - | x | x | - | - | - | Soil, Massachusetts                              | [3]                                    |
| 204 | K-5975c    | x | x | - | x | - | - | - | Pasta salad, fatal food poisoning, 2003, Belgium | [47]                                   |
| 207 | VD140      | x | - | x | - | - | - | - | Soil, Scotland                                   | [17]                                   |
| 216 | B5-2       | x | x | - | - | - | - | - | Soil, China                                      | [17]                                   |
| 217 | BAG1O-1    | x | x | - | - | - | - | - | Soil, Massachusetts                              | [3]                                    |
| 218 | BAG3O-1    | x | x | - | - | - | - | - | Soil, Massachusetts                              | [3]                                    |
| 219 | BAG5X12-1  | x | x | x | - | - | - | - | Soil, Massachusetts                              | [3]                                    |
| 221 | HuA2-9     | x | x | - | - | - | - | - | Environmental isolate                            | [17]                                   |
| 222 | HuA3-9     | x | - | - | - | - | - | - | Environmental isolate                            | [17]                                   |
| 223 | HuB4-4     | x | x | - | - | - | - | - | Environmental isolate                            | [17]                                   |
| 224 | ISP2954    | x | - | x | - | - | - | - | Food (durum wheat), Belgium                      | [17]                                   |
| 226 | Schrouff   | x | x | - | - | - | - | - | Milk, Belgium                                    | [17]                                   |
| 227 | TIAC219    | x | x | - | - | - | - | - | Spaghetti and tomato sauce, lethal intoxication, | [48]                                   |
| 231 | VD146      | x | x | - | - | - | - | - | Soil, Scotland                                   | [17]                                   |
| 233 | VDM053     | x | x | - | - | - | - | - | Water, Belgium                                   | [17]                                   |
| 234 | BAG1O-3    | x | - | x | - | - | - | - | Soil, Massachusetts                              | [3]                                    |
| 290 | H3081.97   | x | - | - | x | - | - | x | Environmental isolate, USA, CDC                  | Sequenced by J. Craig Venter Institute |

**Table S3:** Primer used for transcription analysis of *nhe* and *nhe<sub>a</sub>*.

| Primer       | Target                                     | Sequence [5' – 3']             | Source    |
|--------------|--------------------------------------------|--------------------------------|-----------|
| 16Sf         | Inner fragment of 16S rRNA gene <i>rrn</i> | GAC GTC AAA TCA TCA TGC C      | This work |
| 16Sr         |                                            | GAT TCC AGC TTC ATG TAG G      |           |
| nheAaf       | Inner fragment of <i>nheA<sub>a</sub></i>  | CTA GTA AAG TTA GCA GAG CG     | This work |
| nheAar       |                                            | TTT CTT TTG GTA GAG CTA GAA G  |           |
| nheBaf       | Inner fragment of <i>nheB<sub>a</sub></i>  | TTA TAT TGC ATC GTC GGT TG     | This work |
| nheBar       |                                            | TTA TCT GCT GCT GCG ATG        |           |
| nheCaf       | Inner fragment of <i>nheC<sub>a</sub></i>  | CTA GAT AAC GTG GTG GC         | This work |
| nheCar       |                                            | TTC CGT TTT ATT TTT GGC ATC    |           |
| nheA_qRT_for | Inner fragment of <i>nheA</i>              | AAG TAC AAA GCA TCC AAG AGA    | This work |
| nheA_qRT_rev |                                            | ACA ATA TCT CCA CTT GAT CCT T  |           |
| nheB_qRT_for | Inner fragment of <i>nheB</i>              | GTG AAA CAA GCT CCA GTT C      | [49]      |
| nheB_qRT_rev |                                            | AAA GCG TAC AGA TCC ATT ACT    |           |
| nheC_qRT_for | Inner fragment of <i>nheC</i>              | GCA AAT GCA GAA A/CGA GAA AT   | This work |
| nheC_qRT_rev |                                            | CCT ACT GTA TAC CAT TGA TTT GA |           |

**Table S4:** Intra-operon recombination analysis of enterotoxin operons.

142 concatenated *nheABC* genes, 94 concatenated *hblCDAB* genes and 46 concatenated *hblCDA<sub>a</sub>* genes were investigated. Statistically proven recombination events detected by RDP3 (see Material and Methods). Strains containing two recombinations are highlighted in bold, strains containing three recombinations are additionally underlined. \* breakpoint unclear. All breakpoints of recombination events were independent of gene boundaries.

Thirteen *nhe* intra-operon recombinations involved cluster III strains and all strains containing two recombinations are also found in cluster III. In cluster VI a group of closely related strains (#61, #85, #87, #97 and #137) contains three recombinations.

| Recombinant sequence(s) <i>nheABC</i>                                     | Breakpoints [bp] | Cluster  | Minor parent | Major parent | #programs | Max. average p-value |
|---------------------------------------------------------------------------|------------------|----------|--------------|--------------|-----------|----------------------|
| 212, <b>113</b> , 104, 109, 139, 143, 246                                 | 64 – 2256        | III & II | 140          | 73           | 7         | 1,00E-07             |
| 117, 129, 44, 100, 115, 210, 237, 289, 52, 99, 118, 209, 54, 55, 173, 220 | 1325 – 2202      | IV & V   | 213          | 180          | 7         | 2,30E-02             |
| 62, 102                                                                   | 18 – 2371        | III & IV | 119          | 16           | 7         | 4,56E-03             |
| 70, 75, 90, 119, <b>1</b>                                                 | 1113 – 2424      | III      | 84           | 91           | 7         | 9,30E-03             |
| <b>113</b>                                                                | 65* – 515        | III      | 83           | 246          | 5         | 3,51E-04             |
| 211, 144, 256                                                             | 985 – 2446       | II       | 140          | 56           | 7         | 2,89E-04             |
| 280, 15, 58, 59, 63, 4, 11, 64, 71, 72, 82, 214, 116                      | 1995 – 3031      | IV       | 199          | 240          | 5         | 7,62E-03             |
| 69, 121, 52, 99, 118, 209, 54, 55, 173, 220                               | 87 – 1317*       | V & III  | 117          | 91           | 5         | 1,52E-03             |
| 93                                                                        | 38 – 1954        | III      | 148          | 83           | 7         | 1,07E-03             |
| <u><b>85, 97, 61, 87, 137</b></u>                                         | 188 – 1294       | V & III  | 177          | 93           | 7         | 1,78E-02             |
| 235, 78, 134, 133                                                         | 1581 – 2212      | IV       | 238          | 236          | 4         | 8,16E04              |
| 56, 47                                                                    | 1059 – 2791      | II & III | 140          | 242          | 6         | 2,29E-03             |
| 83                                                                        | 995 – 1582       | III      | 148          | 206          | 6         | 2,59E-02             |
| 174                                                                       | 2355 – 3030      | VI       | 155          | 126          | 4         | 2,18E-03             |
| <b>1, 91</b>                                                              | 386 – 819        | III      | 242          | 5            | 5         | 4,56E-02             |

|                                   |              |          |     |     |   |          |
|-----------------------------------|--------------|----------|-----|-----|---|----------|
| 73                                | 2631 – 2907  | III & IV | 90  | 247 | 4 | 8,18E-03 |
| 141                               | 1996* – 2790 | III & IV | 12  | 4   | 3 | 1,47E-02 |
| <b><u>85, 97, 61, 87, 137</u></b> | 1295* – 2008 | II & IV  | 47  | 135 | 4 | 2,38E-02 |
| <b>91</b>                         | 1686 – 2034  | IV & III | 241 | 28  | 3 | 2,23E-03 |
| 10, 126                           | 1025 – 1327  | VI       | 149 | 174 | 7 | 3,67E-02 |
| <b><u>85, 97, 61, 87, 137</u></b> | 2009* – 2662 | VI       | 177 | 10  | 6 | 4,21E-02 |

| <b>Recombinant sequence(s) <i>hbICDAB</i></b> | <b>Breakpoints [bp]</b> | <b>Cluster</b> | <b>Minor parent</b> | <b>Major parent</b> | <b># programs</b> | <b>Max. average p-value</b> |
|-----------------------------------------------|-------------------------|----------------|---------------------|---------------------|-------------------|-----------------------------|
| 126, 61, 87, 10                               | 2041 – 4892             | VI             | 166                 | 155                 | 7                 | 1,04E-18                    |
| 174                                           | 3681 – 4863*            | VI             | 61                  | 10                  | 7                 | 6,82E-04                    |
| 229, 69, 54                                   | 674 – 1685              | V              | 55                  | 180                 | 4                 | 2,44E-03                    |
| 280                                           | 2867 – 4962             | IV             | 59                  | 241                 | 3                 | 2,58E-03                    |
| 236, 65, 95, 213                              | 2138 – 3421             | IV             | 116                 | 16                  | 3                 | 3,14E-02                    |

| <b>Recombinant sequence(s) <i>hbICDA<sub>a</sub></i></b> | <b>Breakpoints [bp]</b> | <b>Cluster</b> | <b>Minor parent</b> | <b>Major parent</b> | <b># programs</b> | <b>Max. average p-value</b> |
|----------------------------------------------------------|-------------------------|----------------|---------------------|---------------------|-------------------|-----------------------------|
| 144                                                      | 1325 – 2475             | II & VI        | 232                 | 140                 | 6                 | 8,27E-04                    |
| 10, 126, 85, 97                                          | 2173 – 2362             | II & V         | 180                 | 140                 | 3                 | 1,47E-02                    |
| 135, 177, 137, 232, 283, 61, 87, 149, 166, 168           | 2180 – 2362             | II & V         | 180                 | 140                 | 3                 | 1,47E-02                    |

### **Presence of second *nhe<sub>a</sub>* operon in newly sequenced strains**

To confirm the presence of the second *nhe<sub>a</sub>* operon in some of the newly sequenced strains trimmed and quality filtered read data was aligned separately against each of the suspicious *nhe* operons as well as the contigs on which the operons are located on. Read alignment was performed using BWA v.0.7.12 [50]. Subsequently, the resulting SAM files were converted into BAM format, whereby reads not mapping to the reference or not being part of a primary alignment to the reference were discarded. SAM file conversion and filtering was carried out using the 'view' utility of the SAMtools package v.0.1.18 [51]. Filtered BAM files served as input for the 'genomeCoverageBed' utility of the BEDTools suite v.2.17.0 [52] to obtain per-base sequencing depths of respective references in BED files. Sequencing depth histograms (BED files) were used to calculate each reference's median coverage.

Table S5 summarizes the median coverage information obtained for each operon ( $\text{cov}_{\text{operon}}$ ) and the contig ( $\text{cov}_{\text{contig}}$ ) it belongs to. Taking the ratio of  $\text{cov}_{\text{operon}}$  to  $\text{cov}_{\text{contig}}$  shows that all operons fit very well to their genomic backgrounds (contigs), since respective values are close to 1. Significant read pile-up beyond genomic backgrounds of individual operons is not observable, since *nhe<sub>a</sub>* diverged from *nhe* to a point that its reads do not align to *nhe* anymore (and vice versa). Examination of read sets mapping to *nhe<sub>a</sub>* and *nhe* indeed shows that most reads either map to *nhe<sub>a</sub>* or *nhe* (# unique reads) with only a small number of reads mapping to both copies (# combined reads).

**Table S5:** Confirmation of presence of second *nhe<sub>a</sub>* operons.

Three of the *de novo* assembled strains were found to contain *nhe<sub>a</sub>*, which is discerned from *nhe* by its uniquely mapping reads.

\* The *nhe* operon maybe be located within the wrong contig due to an unexpected high ratio ( $\text{cov}_{\text{operon}}/\text{cov}_{\text{contig}}$ ) of 1.44. However, examination of read sets mapping uniquely either to *nhe* or *nhe<sub>a</sub>* unambiguously show that both versions are present within the genome of strain #87.

\*\* Unusually high read number is caused by a ~ 40x higher coverage over the intergenic region (2474 – 2634 bp) between *nheB* and *nheC*, which may be due to a duplication of this region into a plasmid with high copy numbers.

| Strain | Operon                 | Median operon                    | Median contig                    | Ratio                                                       | # Unique | # Combined |
|--------|------------------------|----------------------------------|----------------------------------|-------------------------------------------------------------|----------|------------|
|        |                        | coverage                         | coverage                         |                                                             |          |            |
|        |                        | ( $\text{cov}_{\text{operon}}$ ) | ( $\text{cov}_{\text{contig}}$ ) | ( $\text{cov}_{\text{operon}}/\text{cov}_{\text{contig}}$ ) | reads    | reads      |
| #87    | <i>nhe</i>             | 155                              | 108                              | 1.44*                                                       | 2,996    | 40         |
|        | <i>nhe<sub>a</sub></i> | 153                              | 144                              | 1.06                                                        | 3,183    |            |
| #144   | <i>nhe</i>             | 123                              | 127                              | 0.97                                                        | 9,893**  | 4          |
|        | <i>nhe<sub>a</sub></i> | 235                              | 231                              | 1.02                                                        | 4,800    |            |
| #140   | <i>nhe</i>             | 59                               | 62                               | 0.95                                                        | 950      | 8          |
|        | <i>nhe<sub>a</sub></i> | 66                               | 66                               | 1.00                                                        | 1,106    |            |

### **Presence of second *hbl<sub>a</sub>* operon in newly sequenced strains**

To confirm the presence of the second *hbl<sub>a</sub>* operon in some of the newly sequenced strains the same approach of read remapping and filtering as for the *nhe* operons was applied. In addition to mapping reads to *hbl*, *hbl<sub>a</sub>* and the contigs the operons are located on, reads were also mapped to an artificial sequence construct separating each strain's version of *hbl* and *hbl<sub>a</sub>* by a sequence of 5,000 'N' characters.

Table S6 summarizes the median coverage information obtained for each operon ( $\text{cov}_{\text{operon}}$ ) and the contig ( $\text{cov}_{\text{contig}}$ ) it belongs to as well as the median coverages of *hbl* and *hbl<sub>a</sub>* within artificial sequence constructs ( $\text{cov}_{\text{construct}}$ ). Taking the ratio of  $\text{cov}_{\text{construct}}$  to  $\text{cov}_{\text{contig}}$  shows that all operons fit very well to their genomic backgrounds (contigs), since respective values are close to 1. Taking the ratio of  $\text{cov}_{\text{operon}}$  to  $\text{cov}_{\text{construct}}$  for each individual operon shows that median coverages obtained after remapping against operon sequences alone are higher than compared to the ones after remapping against corresponding artificial constructs, since respective ratio values are greater than 1. This can be explained by the fact that within each artificial construct reads are preferentially forming primary alignments (best hits) to the operon (*hbl* or *hbl<sub>a</sub>*) where they naturally are originating from. In contrast, when mapping against individual operon sequences alone (no construct!), a substantial fraction of reads originating from *hbl<sub>a</sub>* are aligning to *hbl* as well, but only due to the missing possibility of forming a better alignment with *hbl<sub>a</sub>* (since it is not present). This observation accounts also in vice versa direction.

The third copy of *hbl* in strain #245 is due to an assembly error. On the one hand, an extremely low ratio ( $\text{cov}_{\text{construct}}/\text{cov}_{\text{contig}}$ ) of 0.04 was found. On the other hand, there are almost no reads mapping uniquely to the third *hbl* copy, revealing it as a mis-assembled second copy of *hbl<sub>a</sub>*.

**Table S6:** Confirmation of presence of second *hbl<sub>a</sub>* operons.

Five of the *de novo* assembled strains were found to contain two versions of *hbl*, which could be discerned by ratios of  $\text{cov}_{\text{operon}}$  to  $\text{cov}_{\text{construct}}$  being greater than 1.

\* Reads that map uniquely to *hbl<sub>a</sub>* contain reads of *hbl<sub>a</sub>* and *hblCD*. Therefore, coverage is increased in comparison to  $\text{cov}_{\text{contig}}$ .

\*\* Extremely high coverage over the contig (length 4105 bp) suggests that it might be (part of) a plasmid.

\*\*\* In a construct containing *hbl<sub>a</sub>* and *hblCD* few reads map uniquely against *hblCD*.

| Strain | Operon                 | Median<br>construct<br>coverage<br>( $\text{cov}_{\text{construct}}$ ) | Median<br>contig<br>coverage<br>( $\text{cov}_{\text{contig}}$ ) | Ratio<br>( $\text{cov}_{\text{construct}}/\text{cov}_{\text{contig}}$ ) | Median<br>operon<br>coverage<br>( $\text{cov}_{\text{operon}}$ ) | Ratio<br>( $\text{cov}_{\text{operon}}/\text{cov}_{\text{construct}}$ ) |
|--------|------------------------|------------------------------------------------------------------------|------------------------------------------------------------------|-------------------------------------------------------------------------|------------------------------------------------------------------|-------------------------------------------------------------------------|
|        | <i>hbl</i>             | 51                                                                     | 50                                                               | 1.02                                                                    | 68                                                               | 1.33                                                                    |
|        | <i>hbl<sub>a</sub></i> | 180                                                                    | 157                                                              | 1.15                                                                    | 210                                                              | 1.17                                                                    |
| #245   | <i>hbl</i>             | 58                                                                     | 50                                                               | 1.16                                                                    | 68                                                               | 1.17                                                                    |
|        | <i>hblCD</i>           | 202                                                                    | 1,587**                                                          | 0.13                                                                    | 222                                                              | 1.10                                                                    |
|        | <i>hbl<sub>a</sub></i> | 196                                                                    | 157                                                              | 1.25*                                                                   | 210                                                              | 1.07                                                                    |
|        | <i>hblCD</i>           | 60                                                                     | 1,587**                                                          | 0.04***                                                                 | 222                                                              | 3.70***                                                                 |
| #243   | <i>hbl</i>             | 79                                                                     | 83                                                               | 0.95                                                                    | 93                                                               | 1.18                                                                    |
|        | <i>hbl<sub>a</sub></i> | 76                                                                     | 74                                                               | 1.03                                                                    | 126                                                              | 1.66                                                                    |
| #283   | <i>hbl</i>             | 103                                                                    | 104                                                              | 0.99                                                                    | 116                                                              | 1.13                                                                    |
|        | <i>hbl<sub>a</sub></i> | 108                                                                    | 109                                                              | 0.99                                                                    | 156                                                              | 1.44                                                                    |
| #87    | <i>hbl</i>             | 102                                                                    | 108                                                              | 0.94                                                                    | 132                                                              | 1.29                                                                    |
|        | <i>hbl<sub>a</sub></i> | 95                                                                     | 108                                                              | 0.88                                                                    | 169                                                              | 1.78                                                                    |
| #144   | <i>hbl</i>             | 101                                                                    | 101                                                              | 1.00                                                                    | 123                                                              | 1.22                                                                    |
|        | <i>hbl<sub>a</sub></i> | 102                                                                    | 101                                                              | 1.01                                                                    | 157                                                              | 1.54                                                                    |

## References

1. Nakamura KJ, M. A.: **Clarification of the Taxonomy of *Bacillus mycoides***. *International journal of systematic bacteriology* 1995, **45**(1):4.
2. Zwick ME, Joseph SJ, Didelot X, Chen PE, Bishop-Lilly KA, Stewart AC, Willner K, Nolan N, Lentz S, Thomason MK *et al*: **Genomic characterization of the *Bacillus cereus* sensu lato species: backdrop to the evolution of *Bacillus anthracis***. *Genome research* 2012, **22**(8):1512-1524.
3. Van der Auwera GA, Feldgarden M, Kolter R, Mahillon J: **Whole-Genome Sequences of 94 Environmental Isolates of *Bacillus cereus* Sensu Lato**. *Genome announcements* 2013, **1**(5).
4. Rasko DA, Altherr MR, Han CS, Ravel J: **Genomics of the *Bacillus cereus* group of organisms**. *FEMS microbiology reviews* 2005, **29**(2):303-329.
5. Keim P, Price LB, Klevytska AM, Smith KL, Schupp JM, Okinaka R, Jackson PJ, Hugh-Jones ME: **Multiple-locus variable-number tandem repeat analysis reveals genetic relationships within *Bacillus anthracis***. *Journal of bacteriology* 2000, **182**(10):2928-2936.
6. Chun JH, Hong KJ, Cha SH, Cho MH, Lee KJ, Jeong DH, Yoo CK, Rhie GE: **Complete genome sequence of *Bacillus anthracis* H9401, an isolate from a Korean patient with anthrax**. *Journal of bacteriology* 2012, **194**(15):4116-4117.
7. Lund T, Granum PE: **Characterisation of a non-haemolytic enterotoxin complex from *Bacillus cereus* isolated after a foodborne outbreak**. *FEMS microbiology letters* 1996, **141**(2-3):151-156.
8. Haggblom MM, Apetroaie C, Andersson MA, Salkinoja-Salonen MS: **Quantitative Analysis of Cereulide, the Emetic Toxin of *Bacillus cereus*, Produced under Various Conditions**. *Applied and Environmental Microbiology* 2002, **68**(5):2479-2483.
9. Helgason E, Okstad OA, Caugant DA, Johansen HA, Fouet A, Mock M, Hegna I, Kolsto AB: ***Bacillus anthracis*, *Bacillus cereus*, and *Bacillus thuringiensis* - one species on the basis of genetic evidence**. *Appl Environ Microbiol* 2000, **66**(6):2627-2630.
10. Rasko DA, Ravel J, Okstad OA, Helgason E, Cer RZ, Jiang L, Shores KA, Fouts DE, Tourasse NJ, Angiuoli SV *et al*: **The genome sequence of *Bacillus cereus* ATCC 10987 reveals metabolic adaptations and a large plasmid related to *Bacillus anthracis* pXO1**. *Nucleic Acids Res* 2004, **32**(3):977-988.
11. Klee SR, Brzuszkiewicz EB, Nattermann H, Bruggemann H, Dupke S, Wollherr A, Franz T, Pauli G, Appel B, Liebl W *et al*: **The genome of a *Bacillus* isolate causing anthrax in chimpanzees combines chromosomal properties of *B. cereus* with *B. anthracis* virulence plasmids**. *PloS one* 2010, **5**(7):e10986.
12. Ji F, Zhu Y, Ju S, Zhang R, Yu Z, Sun M: **Promoters of crystal protein genes do not control crystal formation inside exosporium of *Bacillus thuringiensis* ssp. *finitimus* strain YBT-020**. *FEMS microbiology letters* 2009, **300**(1):11-17.

13. Hernandez E, Ramisse F, Ducoureau JP, Cruel T, Cavallo JD: ***Bacillus thuringiensis* subsp. *konkukian* (serotype H34) superinfection: case report and experimental evidence of pathogenicity in immunosuppressed mice.** *Journal of clinical microbiology* 1998, **36**(7):2138-2139.
14. Cachat E, Barker M, Read TD, Priest FG: **A *Bacillus thuringiensis* strain producing a polyglutamate capsule resembling that of *Bacillus anthracis*.** *FEMS microbiology letters* 2008, **285**(2):220-226.
15. Challacombe JF, Altherr MR, Xie G, Bhotika SS, Brown N, Bruce D, Campbell CS, Campbell ML, Chen J, Chertkov O *et al*: **The complete genome sequence of *Bacillus thuringiensis* Al Hakam.** *Journal of bacteriology* 2007, **189**(9):3680-3681.
16. Turnbull PC, Nottingham JF, Ghosh AC: **A severe necrotic enterotoxin produced by certain food, food poisoning and other clinical isolates of *Bacillus cereus*.** *British journal of experimental pathology* 1977, **58**(3):273-280.
17. Hu X, Van der Auwera G, Timmery S, Zhu L, Mahillon J: **Distribution, diversity, and potential mobility of extrachromosomal elements related to the *Bacillus anthracis* pXO1 and pXO2 virulence plasmids.** *Applied and Environmental Microbiology* 2009, **75**(10):3016-3028.
18. Agata N, Ohta M, Yokoyama K: **Production of *Bacillus cereus* emetic toxin (cereulide) in various foods.** *International journal of food microbiology* 2002, **73**(1):23-27.
19. Xiong Z, Jiang Y, Qi D, Lu H, Yang F, Yang J, Chen L, Sun L, Xu X, Xue Y *et al*: **Complete genome sequence of the extremophilic *Bacillus cereus* strain Q1 with industrial applications.** *Journal of bacteriology* 2009, **191**(3):1120-1121.
20. Jessberger N, Dietrich R, Bock S, Didier A, Martlbauer E: ***Bacillus cereus* enterotoxins act as major virulence factors and exhibit distinct cytotoxicity to different human cell lines.** *Toxicon : official journal of the International Society on Toxinology* 2014, **77**:49-57.
21. Swiecicka I, Fiedoruk K, Bednarz G: **The occurrence and properties of *Bacillus thuringiensis* isolated from free-living animals.** *Letters in applied microbiology* 2002, **34**(3):194-198.
22. Guinebretiere MH, Broussolle V, Nguyen-The C: **Enterotoxigenic Profiles of Food-Poisoning and Food-Borne *Bacillus cereus* Strains.** *Journal of clinical microbiology* 2002, **40**(8):3053-3056.
23. Frankland GC, Frankland PF: **Studies on Some New Micro-Organisms Obtained from Air.** *Philosophical Transactions of the Royal Society B: Biological Sciences* 1887, **178**(0):257-287.
24. Dupont C, Thomassin S, Bourel G, Schmitt P: **Anaerobiosis and low specific growth rates enhance hemolysin BL production by *Bacillus cereus* F4430/73.** *Archives of microbiology* 2004, **182**(1):90-95.

25. He J, Shao X, Zheng H, Li M, Wang J, Zhang Q, Li L, Liu Z, Sun M, Wang S *et al*: **Complete genome sequence of *Bacillus thuringiensis* mutant strain BMB171**. *Journal of bacteriology* 2010, **192**(15):4074-4075.
26. Lereclus D, Arantes O, Chaufaux J, Lecadet M: **Transformation and expression of a cloned delta-endotoxin gene in *Bacillus thuringiensis***. *FEMS microbiology letters* 1989, **51**(1):211-217.
27. He J, Wang J, Yin W, Shao X, Zheng H, Li M, Zhao Y, Sun M, Wang S, Yu Z: **Complete genome sequence of *Bacillus thuringiensis* subsp. *chinensis* strain CT-43**. *Journal of bacteriology* 2011, **193**(13):3407-3408.
28. Hoffmaster AR, Novak RT, Marston CK, Gee JE, Helsel L, Pruckler JM, Wilkins PP: **Genetic diversity of clinical isolates of *Bacillus cereus* using multilocus sequence typing**. *BMC microbiology* 2008, **8**:191.
29. Wang A, Pattemore J, Ash G, Williams A, Hane J: **Draft genome sequence of *Bacillus thuringiensis* strain DAR 81934, which exhibits molluscicidal activity**. *Genome announcements* 2013, **1**(2):e0017512.
30. Murawska E, Fiedoruk K, Bideshi DK, Swiecicka I: **Complete genome sequence of *Bacillus thuringiensis* subsp. *thuringiensis* strain IS5056, an isolate highly toxic to *Trichoplusia ni***. *Genome announcements* 2013, **1**(2):e0010813.
31. Cheng T, Lin P, Jin S, Wu Y, Fu B, Long R, Liu D, Guo Y, Peng L, Xia Q: **Complete Genome Sequence of *Bacillus bombysepticus*, a Pathogen Leading to Bombyx mori Black Chest Septicemia**. *Genome announcements* 2014, **2**(3).
32. Jimenez G, Urdiain M, Cifuentes A, Lopez-Lopez A, Blanch AR, Tamames J, Kampfer P, Kolsto AB, Ramon D, Martinez JF *et al*: **Description of *Bacillus toyonensis* sp. nov., a novel species of the *Bacillus cereus* group, and pairwise genome comparisons of the species of the group by means of ANI calculations**. *Systematic and applied microbiology* 2013, **36**(6):383-391.
33. Guan P, Ai P, Dai X, Zhang J, Xu L, Zhu J, Li Q, Deng Q, Li S, Wang S *et al*: **Complete genome sequence of *Bacillus thuringiensis* serovar Sichuansis strain MC28**. *Journal of bacteriology* 2012, **194**(24):6975.
34. Hoa NT, Baccigalupi L, Huxham A, Smertenko A, Van PH, Ammendola S, Ricca E, Cutting SM: **Characterization of *Bacillus* Species Used for Oral Bacteriotherapy and Bacterioprophyllaxis of Gastrointestinal Disorders**. *Applied and Environmental Microbiology* 2000, **66**(12):5241-5247.
35. Lechner S, Mayr R, Francis KP, Pruss BM, Kaplan T, Wiessner-Gunkel E, Stewart GS, Scherer S: ***Bacillus weihenstephanensis* sp. nov. is a new psychrotolerant species of the *Bacillus cereus* group**. *International journal of systematic bacteriology* 1998, **48 Pt 4**:1373-1382.

36. Hoton FM, Fornelos N, N'Guessan E, Hu X, Swiecicka I, Dierick K, Jaaskelainen E, Salkinoja-Salonen M, Mahillon J: **Family portrait of *Bacillus cereus* and *Bacillus weihenstephanensis* cereulide-producing strains.** *Environmental microbiology reports* 2009, **1**(3):177-183.
37. Thorsen L, Hansen BM, Nielsen KF, Hendriksen NB, Phipps RK, Budde BB: **Characterization of emetic *Bacillus weihenstephanensis*, a new cereulide-producing bacterium.** *Applied and Environmental Microbiology* 2006, **72**(7):5118-5121.
38. Lund T, De Buyser ML, Granum PE: **A new cytotoxin from *Bacillus cereus* that may cause necrotic enteritis.** *Molecular microbiology* 2000, **38**(2):254-261.
39. Guinebretiere MH, Auger S, Galleron N, Contzen M, De Sarrau B, De Buyser ML, Lamberet G, Fagerlund A, Granum PE, Lereclus D *et al*: ***Bacillus cytotoxicus* sp. nov. is a novel thermotolerant species of the *Bacillus cereus* Group occasionally associated with food poisoning.** *International journal of systematic and evolutionary microbiology* 2013, **63**(Pt 1):31-40.
40. Antwerpen M, Proenca DN, Ruckert C, Licht K, Kalinowski J, Hanczaruk M, Tiemann C, Grass G: **Draft genome sequence of *Bacillus anthracis* BF-1, isolated from Bavarian cattle.** *Journal of bacteriology* 2012, **194**(22):6360-6361.
41. Harrington R, Ondov BD, Radune D, Friss MB, Klubnik J, Diviak L, Hnath J, Cendrowski SR, Blank TE, Karaolis D *et al*: **Genome Sequence of the Attenuated Carbosap Vaccine Strain of *Bacillus anthracis*.** *Genome announcements* 2013, **1**(1).
42. Price EP, Seymour ML, Sarovich DS, Latham J, Wolken SR, Mason J, Vincent G, Drees KP, Beckstrom-Sternberg SM, Phillippy AM *et al*: **Molecular epidemiologic investigation of an anthrax outbreak among heroin users, Europe.** *Emerg Infect Dis* 2012, **18**(8):1307-1313.
43. Ruckert C, Licht K, Kalinowski J, Espirito Santo C, Antwerpen M, Hanczaruk M, Reischl U, Holzmann T, Gessner A, Tiemann C *et al*: **Draft genome sequence of *Bacillus anthracis* UR-1, isolated from a German heroin user.** *Journal of bacteriology* 2012, **194**(21):5997-5998.
44. Miller JM, Hair JG, Hebert M, Hebert L, Roberts FJ, Jr., Weyant RS: **Fulminating bacteremia and pneumonia due to *Bacillus cereus*.** *Journal of clinical microbiology* 1997, **35**(2):504-507.
45. Lereclus D, Menou G, Lecadet MM: **Isolation of a DNA sequence related to several plasmids from *Bacillus thuringiensis* after a mating involving the *Streptococcus faecalis* plasmid pAM beta 1.** *Molecular & general genetics : MGG* 1983, **191**(2):307-313.
46. Su L, Zhou T, Zhou L, Fang X, Li T, Wang J, Guo Y, Chang D, Wang Y, Li D *et al*: **Draft genome sequence of *Bacillus cereus* strain LCT-BC244.** *Journal of bacteriology* 2012, **194**(13):3549.

47. Dierick K, Van Coillie E, Swiecicka I, Meyfroidt G, Devlieger H, Meulemans A, Hoedemaekers G, Fourie L, Heyndrickx M, Mahillon J: **Fatal family outbreak of *Bacillus cereus*-associated food poisoning.** *Journal of clinical microbiology* 2005, **43**(8):4277-4279.
48. Naranjo M, Denayer S, Botteldoorn N, Delbrassinne L, Veys J, Waegenaere J, Sirtaine N, Driesen RB, Sipido KR, Mahillon J *et al*: **Sudden death of a young adult associated with *Bacillus cereus* food poisoning.** *Journal of clinical microbiology* 2011, **49**(12):4379-4381.
49. Jeßberger N, Krey VM, Rademacher C, Böhm M-E, Mohr A-K, Ehling Schulz M, Scherer S, Märtlbauer E: **From genome to toxicity: a combinatory approach highlights the complexity of enterotoxin production in *Bacillus cereus*.** *Front Microbiol* 2015, **6**.
50. Li H, Durbin R: **Fast and accurate short read alignment with Burrows-Wheeler transform.** *Bioinformatics* 2009, **25**(14):1754-1760.
51. Li H, Handsaker B, Wysoker A, Fennell T, Ruan J, Homer N, Marth G, Abecasis G, Durbin R, Genome Project Data Processing S: **The Sequence Alignment/Map format and SAMtools.** *Bioinformatics* 2009, **25**(16):2078-2079.
52. Quinlan AR: **BEDTools: The Swiss-Army Tool for Genome Feature Analysis.** *Current protocols in bioinformatics / editorial board, Andreas D Baxevanis [et al]* 2014, **47**:11 12 11-11 12 34.
